# Supplementary material for: Mutational Evolution in Relapsed Diffuse Large B-Cell Lymphoma
Source: PubMed Central journal article supplement (PMC6265691; doi:10.3390/cancers10110459), 2018-11-20
Supplement: cancers-10-00459-s001.pdf [file cancers-10-00459-s001.pdf]

# Supplementary Materials: Mutational Evolution in Relapsed Diffuse Large B-Cell Lymphoma

Marcel Nijland, Annika Seitz, Martijn Terpstra, Gustaaf W. van Imhoff, Philip M Kluin, Tom van Meerten, Çiğdem Atayar, Léon C. van Kempen, Arjan Diepstra, Klaas Kok and Anke van den Berg

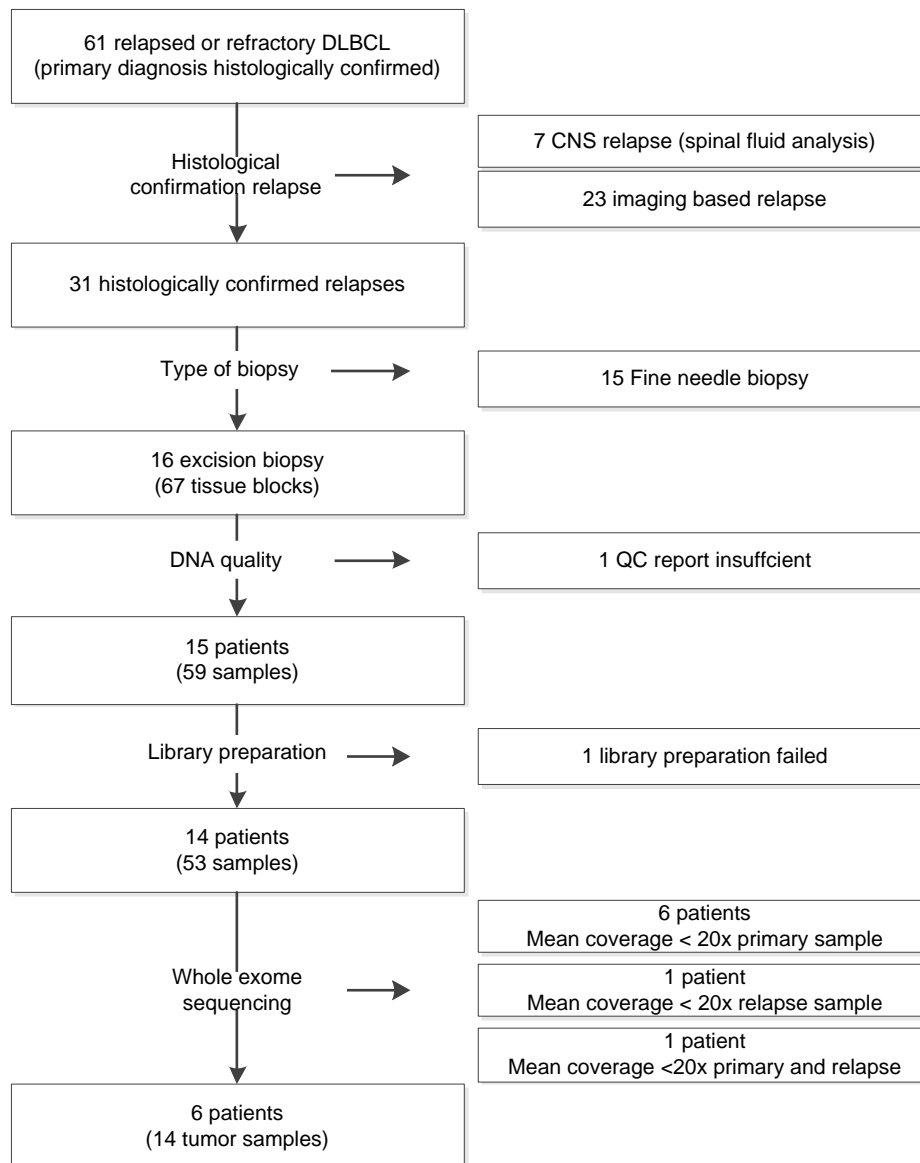

**Figure S1.** Schematic representation of patient and sample selection. Of the 61 patients, 6 patients had high quality formalin fixed paraffin embedded (FFPE) paired tumor biopsies sufficient for WES analyses. The remainder of the patients were not eligible due to a lack of sufficient tumor tissue or to low coverage.

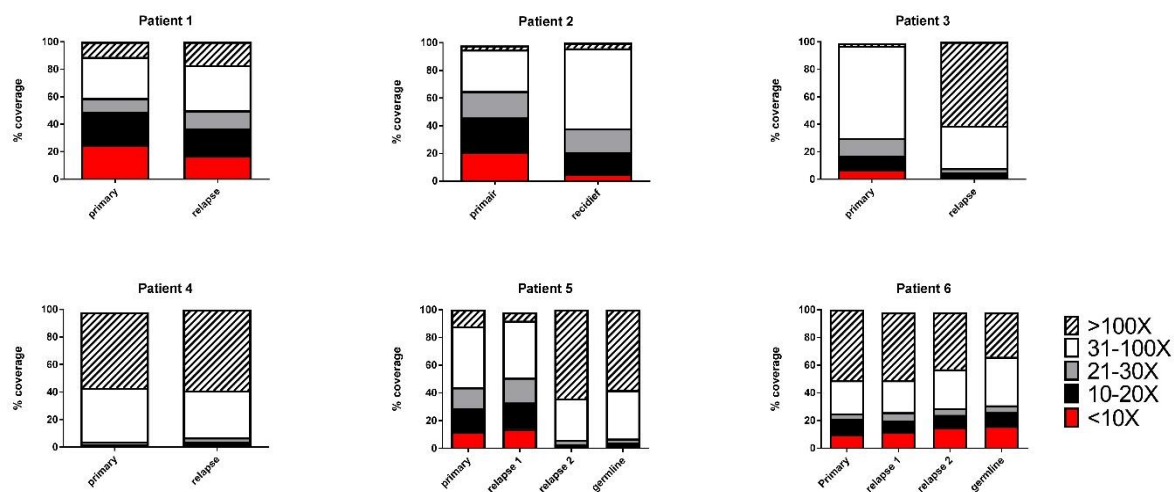

Figure S2. Percentage of the target region with indicated read depth (X) across the analyzed samples.

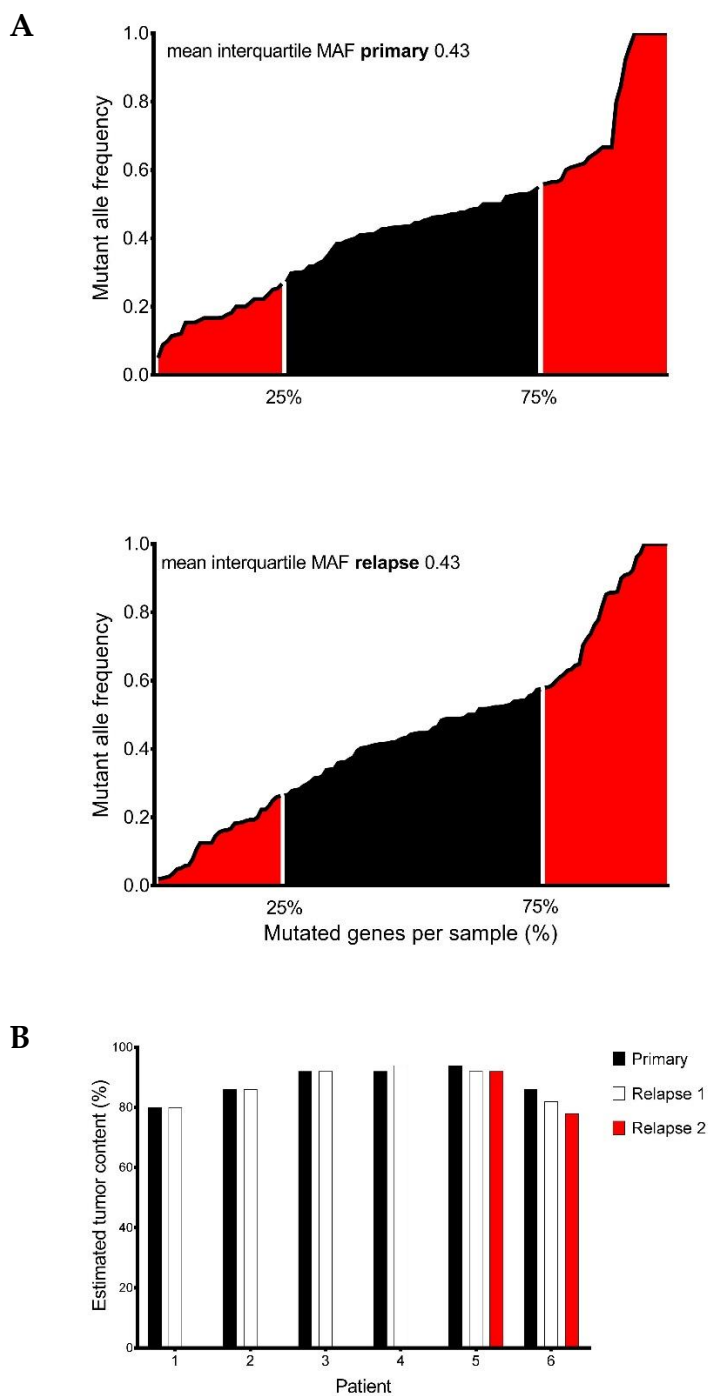

**Figure S3.** Estimated tumor cell percentages. **(A)** Example of 25–75% interquartile range MAF in two paired biopsies. **(B)** Estimation of the tumor percentages across all samples. The median tumor cell percentage was 90%. There were no significant differences between paired samples.

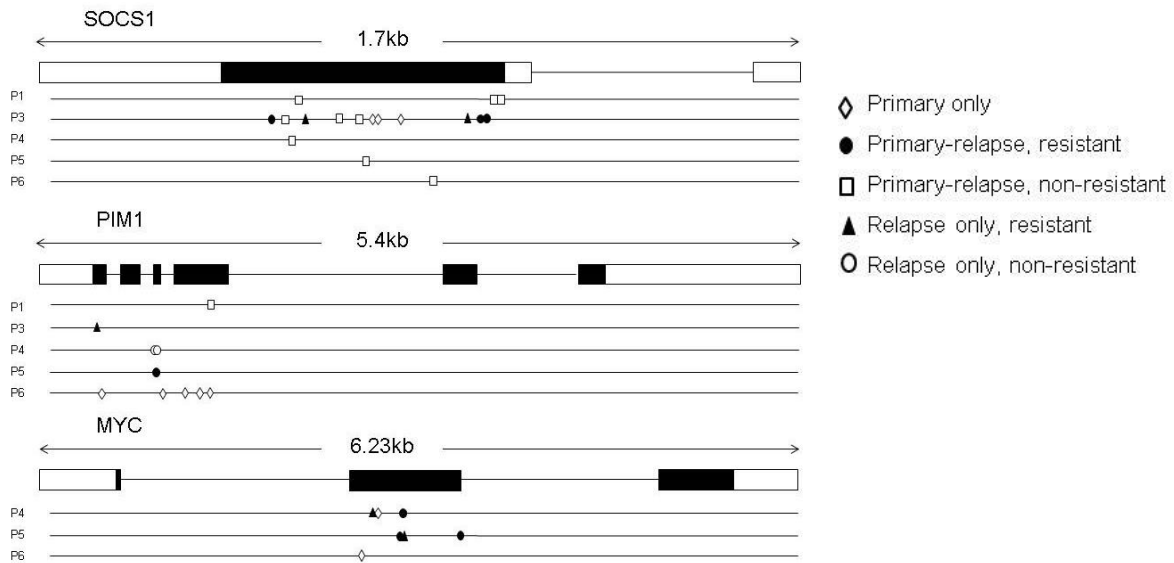

**Figure S4.** Schematic representation of location and type of mutations in *SOCS1*, *PIM1*, and *MYC*. In line with the literature, there are no specific hotspots. Symbols represent whether a mutation was found in the primary sample, relapse sample, or both. Mutations with black symbols are possibly related to therapy resistance (mutant allele frequency  $\geq 20\%$  and at least two times higher in the relapse sample compared to the primary tumor).

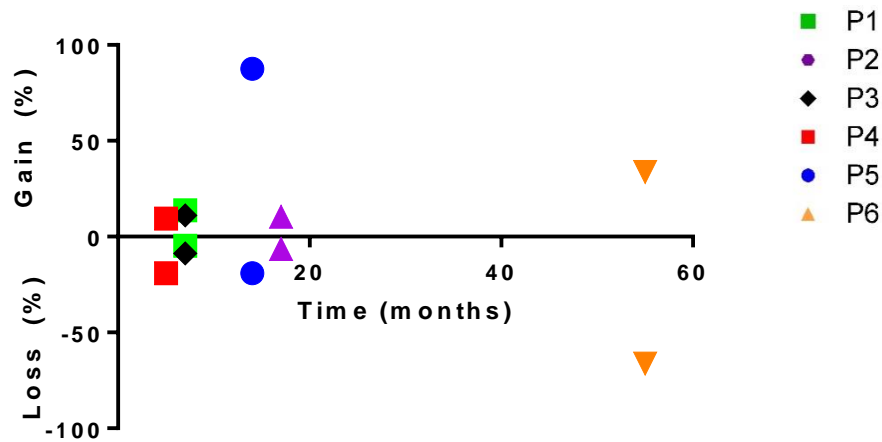

**Figure S5.** Loss and increase in mutational load as a variable over time did not show a significant correlation ( $\rho$ , 0.32;  $p$ , 0.71).

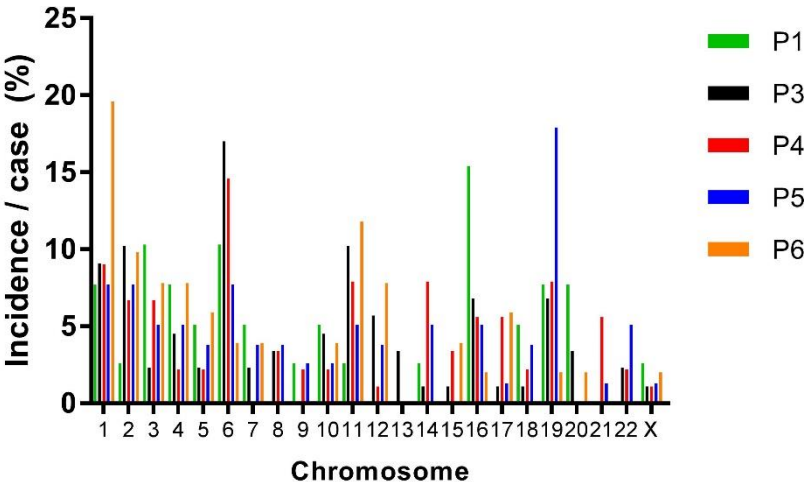

**Figure S6.** Distribution of mutations detected only in the relapse samples across the genome showed a random pattern. Note: Due to a limited number of mutations, we do not show data for patient 2.

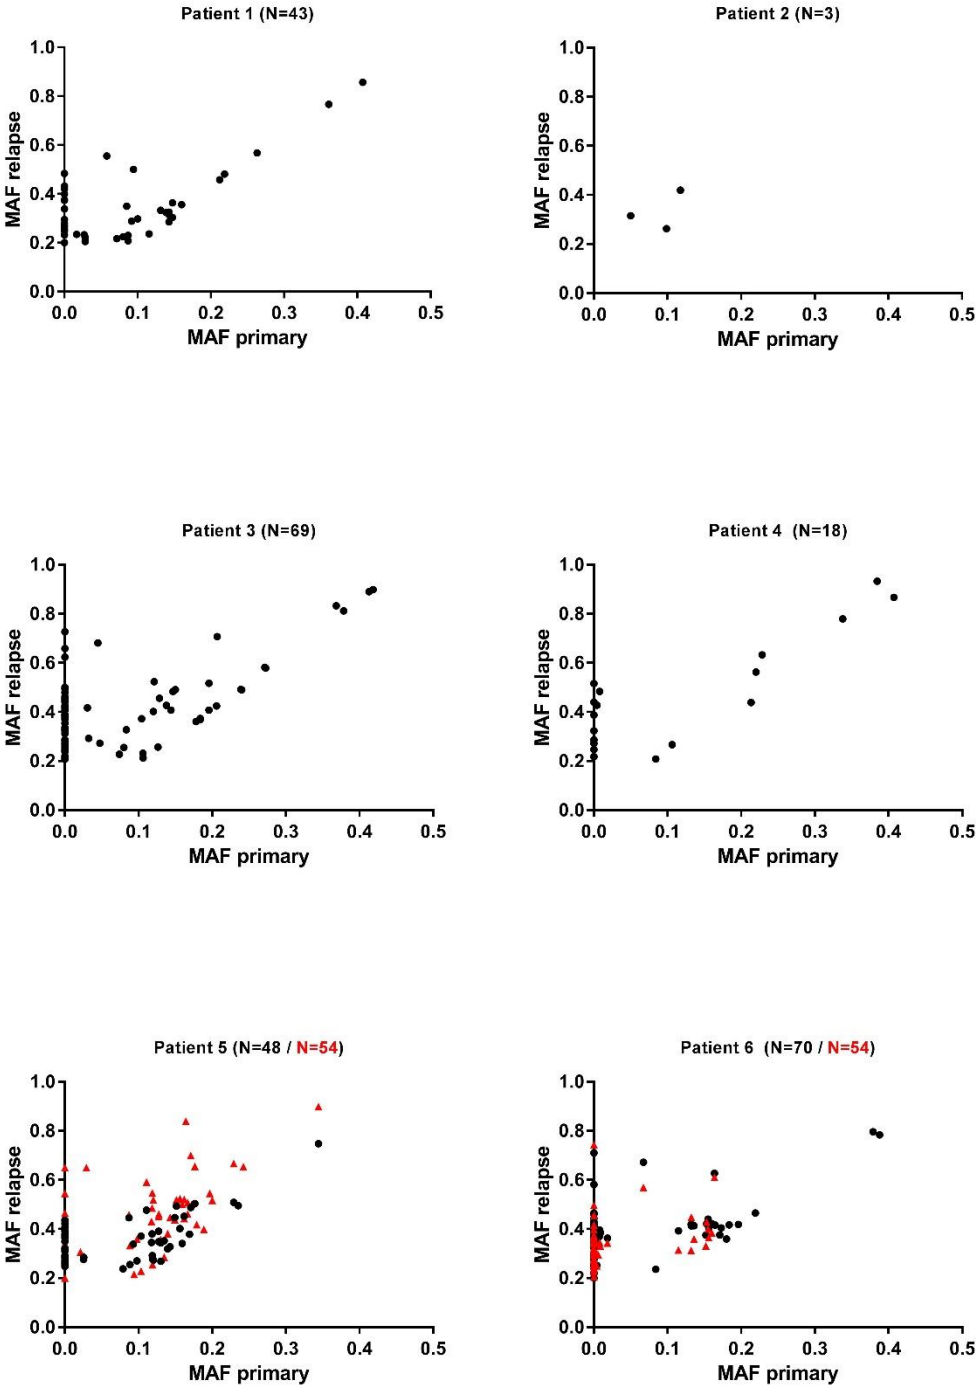

**Figure S7.** Global view of mutant allele frequency (MAF) in primary and relapse samples of matched cases. Mutations possibly related to therapy resistance have at least 2-fold increased MAF in relapse samples. The red and black dots in the plots of patient 5 and 6 indicate mutations in the 2 different relapse samples. In total there were 374 mutations across 264 genes that were possibly related to therapy resistance.

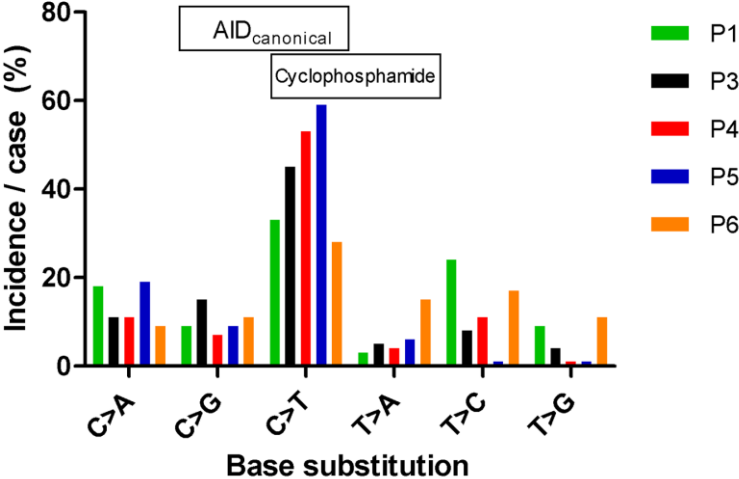

**Figure S8.** Prevalence of type of base substitutions across the relapse samples. The C:G > T:A base substitution was most frequently observed. This substitution can be caused as a consequence of cyclophosphamide, and to a lesser extent be induced by canonical Activation-Induced Deaminase (AID) activity. Note: Due to a limited number of mutations, no data is shown for patient 2.

**Table S1.** Mean read depth (X) of genes known to be mutated in DLBCL at various frequencies in the Cosmic database version 86 across the 14 tumor samples.

| Gene    | Frequency Cosmic (%) | Sample                |                    |                 |                       |                      |                       |                 |                 |                        |                       |                 |                 |                 |                 |
|---------|----------------------|-----------------------|--------------------|-----------------|-----------------------|----------------------|-----------------------|-----------------|-----------------|------------------------|-----------------------|-----------------|-----------------|-----------------|-----------------|
|         |                      | 1P                    | 1R                 | 2P              | 2R                    | 3P                   | 3R                    | 4P              | 4R              | 5P                     | 5R1                   | 5R2             | 6P              | 6R1             | 6R2             |
| KMT2D   | 28                   | 404                   | 399                | 176             | 193                   | 201                  | 580                   | 457             | 1010            | 277                    | 181                   | 725             | 783             | 977             | 670             |
| EZH2    | 12                   | 243                   | 189                | 65              | 108                   | 163                  | 335                   | 245             | 267             | 100                    | 116                   | 506             | 629             | 633             | 422, Exon 1 low |
| TNFAIP3 | 9                    | 246                   | 322                | 106             | 117, Exon 8+9 nothing | 85, Exon 8+9 nothing | 194, Exon 8+9 nothing | 456             | 896             | 144                    | 103                   | 419             | 635             | 409             | 341             |
| CARD11  | 8                    | 301, Exon 1+2 nothing | 430 Exon 1+2 low   | 92              | 213                   | 205                  | 403                   | 212             | 461             | 157, first 3 Exons low | 72, first 3 Exons low | 441             | 632             | 829             | 607             |
| TET2    | 8                    | 179                   | 216                | 32              | 111                   | 99                   | 255                   | 319             | 474             | 170                    | 89                    | 427             | 380             | 519             | 304             |
| FOXO1   | 5,6                  | Exon 3 no reads       | Exon 3 no reads    | Exon 3 no reads | Exon 3 no reads       | Exon 3 no reads      | Exon 3 no reads       | Exon 3 no reads | Exon 3 no reads | Exon 3 no reads        | Exon 3 no reads       | Exon 3 no reads | Exon 3 no reads | Exon 3 no reads | Exon 3 no reads |
| ZNF521  | 4,9                  | 155                   | 226                | 67              | 92                    | 175                  | 254                   | 246             | 412             | 159                    | 84                    | 352             | 514             | 502             | 297             |
| RELN    | 4,6                  | 92                    | 92                 | 59              | 108                   | 79                   | 180                   | 118             | 145             | 70                     | 61                    | 264             | 262             | 284             | 196             |
| TLN2    | 4,3                  | 309                   | 352                | 103             | 110                   | 123                  | 263                   | 249             | 545             | 159                    | 92                    | 300             | 522             | 691             | 369             |
| DMXL1   | 3,4                  | 142                   | 124                | 61              | 78                    | 132                  | 184                   | 177             | 217             | 113                    | 82                    | 382             | 291             | 267             | 205             |
| DSP     | 2,8                  | 209                   | 332                | 83              | 137                   | 135                  | 400                   | 325             | 762             | 212                    | 98                    | 490             | 556             | 711             | 413             |
| FRMPD1  | 2,8                  | 137                   | 212                | 44              | 110                   | 102                  | 289                   | 299             | 756             | 166                    | 92                    | 416             | 559             | 651             | 454             |
| CD79A   | 2,2                  | 294                   | 300                | 71              | 127                   | 111                  | 378                   | 343             | 556             | 139                    | 124                   | 369             | 531             | 741             | 361             |
| CSMD3   | 2,2                  | 113                   | 87                 | 84              | 96                    | 82                   | 151                   | 133             | 214             | 113                    | 71                    | 301             | 220             | 216             | 238             |
| ATM     | 2,0                  | 197                   | 126                | 72              | 119                   | 89                   | 229                   | 221             | 190             | 127                    | 72                    | 411             | 363             | 327             | 300             |
| BRAF    | 2,0                  | 129                   | 144                | 56              | 122                   | 261                  | 164                   | 187             | 204             | 89                     | 56                    | 307             | 232             | 200             | 205             |
| PTEN    | 1,8                  | 104                   | 63                 | 79              | 101                   | 81                   | 115                   | 204             | 147             | 80                     | 80, Exon 5            | 80              | 415             | 304             | 320             |
| CD79B   | 1,3                  | 342                   | 389                | 91              | 130                   | 95                   | 370                   | 377             | 894             | 226                    | 137                   | 561             | 900             | 1494            | 807             |
| FBXO11  | 1,9                  | 103, Exon 5/13 low    | 160, Exon 5/13 low | 74              | 108                   | 99                   | 237                   | 269             | 363             | 79                     | 74                    | 322             | 299             | 248             | 207             |
| NOTCH1  | 1,9                  | 353                   | 534                | 127             | 144                   | 159                  | 369                   | 309             | 970             | 216                    | 133                   | 500             | 653             | 841             | 532             |
| CD83    | 0,9                  | 199                   | 241                | 64              | 120                   | 122                  | 338, Exon 4+5 nothing | 546             | 875             | 139                    | 130                   | 482             | 615             | 627             | 394             |



**Table S2.** List of 28 genes mutated in 3 or more patients in either the primary or relapse tumor sample, or both. The position and type of mutation and Indels are listed per patient.

| Patients | Gene                                             | Symbol   | P1                                                                                                                  | P2 | P3                                                                                                                                                                                                                                                  | P4                                                                                                                         | P5            | P6                                                                                                                                                    |
|----------|--------------------------------------------------|----------|---------------------------------------------------------------------------------------------------------------------|----|-----------------------------------------------------------------------------------------------------------------------------------------------------------------------------------------------------------------------------------------------------|----------------------------------------------------------------------------------------------------------------------------|---------------|-------------------------------------------------------------------------------------------------------------------------------------------------------|
| 5        | Pim-1 proto-oncogene, serine/threonine kinase    | PIM1     | 37139198, G/A                                                                                                       | -  | 37138423, G/C                                                                                                                                                                                                                                       | 37138793,<br>GACTGGGGAGAGC<br>/G<br>37138790, TC/T                                                                         | 37138804, G/C | 37138553, G/C<br>37138956, G/A<br>37139004, G/A<br>37139204, C/G<br>37139063, G/A                                                                     |
| 5        | suppressor of cytokine signaling 1               | SOCS1    | 11349329, CT/C<br>11348873, C/G<br>11349332, C/A                                                                    | -  | 11 mutations                                                                                                                                                                                                                                        | 11348706, C/G                                                                                                              | 11349029, C/G | 11349162, G/C                                                                                                                                         |
| 4        | AHNAK nucleoprotein 2                            | AHNAK2   | 105412260, G/C<br>105415607, C/G                                                                                    | -  | 105412163, C/G<br>105412138, A/G<br>105418391, C/T                                                                                                                                                                                                  | 105412138, A/G<br>105412163, C/G<br>105412260, G/C<br>105415433, T/C<br>105415431, C/G<br>105415411, G/C<br>105417725, C/G | 11 mutations  | -                                                                                                                                                     |
| 4        | major histocompatibility complex, class II, DRB1 | HLA-DRB1 | 32552137, G/A<br>32552132, T/A<br>32552131, C/A<br>32552130, C/A<br>32552091, G/C<br>32552085, G/T<br>32552078, A/T | -  | 14 mutations                                                                                                                                                                                                                                        | 14 mutations                                                                                                               | 48 mutations  | -                                                                                                                                                     |
| 3        | major histocompatibility complex, class II, DRB5 | HLA-DRB5 | -                                                                                                                   | -  | 32497960, CTT/C<br>32497957, C/CAG<br>32489876, T/A<br>32489881, G/T<br>32487164, G/A<br>32489795, T/A,C<br>32489835, C/G<br>32489731, G/C<br>32497905, G/AT<br>31324210, G/A<br>31324208, G/T<br>31324057, C/A<br>31324536, T/GA<br>31324601, C/CA | 16 mutations                                                                                                               | -             | 32487165, G/C<br>32489856, C/A<br>32489936, T/A<br>32497962, T/G<br>32497961, T/G<br>32489855, T/A<br>32489877, C/A<br>32489933, T/C<br>32489934, C/G |
| 3        | major histocompatibility complex, class I, B     | HLA-B    | -                                                                                                                   | -  | 31324057, C/A<br>31324536, T/GA<br>31324601, C/CA                                                                                                                                                                                                   | 12 mutations                                                                                                               | -             | 31324050, C/T<br>31324576, G/A                                                                                                                        |

|   |                                                  |          |               |                                                    |                                                                                                                                                                                                                                                                                                          |                                                                            |                                                                                        |                                  |
|---|--------------------------------------------------|----------|---------------|----------------------------------------------------|----------------------------------------------------------------------------------------------------------------------------------------------------------------------------------------------------------------------------------------------------------------------------------------------------------|----------------------------------------------------------------------------|----------------------------------------------------------------------------------------|----------------------------------|
| 3 | ankyrin repeat and LEM domain containing 1       | ANKLE1   | -             | -                                                  | 31324207, AGG/A<br>31324205, G/GCC<br>17397499, GTT/G<br>17397497, GTGTT/G<br>17397481, G/T<br>17397493, G/T<br>17397483, G/T<br>17397353, C/G<br>23523446, C/T<br>23523445, G/C<br>23523478, G/C<br>23523979, C/A<br>23523635, A/G<br>23523937, A/G<br>23523923, A/C<br>23523266, C/T<br>152281039, G/A | 17397493, G/T<br>17397483, G/T<br>17397495, GTGTGTT/G<br>17397497, GTGTT/G | 17397497, GTGTT/G<br>17397499, GTT/G                                                   | -                                |
| 3 | GTPase activating protein                        | BCR      | 23523353, G/A | -                                                  | 23523979, C/A<br>23523635, A/G<br>23523937, A/G<br>23523923, A/C<br>23523266, C/T<br>152281039, G/A                                                                                                                                                                                                      | -                                                                          | -                                                                                      | 23523586, C/T                    |
| 3 | filaggrin                                        | FLG      | -             | 152278856, T/G<br>152281228, C/G                   | 152281228, C/G<br>152278706, G/A<br>152284948, G/A                                                                                                                                                                                                                                                       | -                                                                          | -                                                                                      | 152276954, G/A<br>152276798, C/T |
| 3 | transmembrane phosphatase with tensin homology   | TPTE     | 10906915, C/T | 10942924, CCTT/C<br>10943003, C/T<br>10942756, G/A | -                                                                                                                                                                                                                                                                                                        | 10942756, G/A<br>10942923, G/A                                             | -                                                                                      | -                                |
| 3 | major histocompatibility complex, class II, DQB1 | HLA-DQB1 | 32634302, A/G | -                                                  | 32632688, T/G<br>32632694, C/AG<br>32632703, G/A                                                                                                                                                                                                                                                         | 32632688, T/A<br>32632601, G/C                                             | -                                                                                      | -                                |
| 3 | MYC proto-oncogene, bHLH transcription factor    | MYC      | -             | -                                                  | -                                                                                                                                                                                                                                                                                                        | 128750783, G/A<br>128750938, C/T<br>128750713, C/T                         | 128750686, C/T<br>128750683, C/T<br>128751265, G/A                                     | 128750680, A/G                   |
| 3 | major histocompatibility complex, class I, C     | HLA-C    | 31238053, G/C | -                                                  | 31239006, G/T                                                                                                                                                                                                                                                                                            | 31239101, G/A,T<br>31237802, A/G<br>31238957, A/C<br>23230396,             | -                                                                                      | -                                |
| 3 | immunoglobulin lambda like polypeptide 5         | IGLL5    | -             | -                                                  | 23237597, CCT/C                                                                                                                                                                                                                                                                                          | TCAGTTGGAAGCA<br>GCCGATCCAGC/T<br>23235946, G/C                            | -                                                                                      | 23230316, T/C<br>23230360, G/A   |
| 3 | notch 2 N-terminal like A                        | NOTCH2NL | -             | 145281656, A/T                                     | -                                                                                                                                                                                                                                                                                                        | 145281613, C/A<br>145281633, C/A                                           | 145273366, C/T<br>145281613, C/A<br>145281633, C/A<br>145281656, A/T<br>145281408, C/T | -                                |

|   |                                               |          |                                                        |                                                                                                     |                                                        |                                                                        |                                  |                                                    |
|---|-----------------------------------------------|----------|--------------------------------------------------------|-----------------------------------------------------------------------------------------------------|--------------------------------------------------------|------------------------------------------------------------------------|----------------------------------|----------------------------------------------------|
|   |                                               |          |                                                        |                                                                                                     |                                                        |                                                                        | 145273345, T/C<br>145281543, C/T |                                                    |
| 3 | protein tyrosine phosphatase, receptor type U | PTPRU    | -                                                      | 29602227, G/T                                                                                       | 29609217, G/A<br>29587338, G/A                         | 29587407, A/C                                                          | -                                | -                                                  |
| 3 | Fc fragment of IgG binding protein            | FCGBP    | 40392588, C/T                                          | -                                                                                                   | 40408268, G/T<br>40368330, C/T                         | 40368321, G/A                                                          | -                                | -                                                  |
| 3 | collagen type XVIII alpha 1 chain             | COL18A1  | -                                                      | -                                                                                                   | -                                                      | -                                                                      | -                                | -                                                  |
| 3 | ATPase family, AAA domain containing 3B       | ATAD3B   | -                                                      | 1418456, C/CCT<br>1431165, C/T                                                                      | 1430957, G/A<br>1431165, C/T                           | 1425753, T/C                                                           | -                                | -                                                  |
| 3 | ciliary rootlet coiled-coil, rootletin        | CROCC    | -                                                      | 17266536, G/C                                                                                       | 17264920, C/T                                          | 17264920, C/T                                                          | -                                | -                                                  |
| 3 | kelch like family member 14                   | KLHL14   | -                                                      | -                                                                                                   | -                                                      | 30350086, C/T                                                          | 30350026, G/A                    | 70314679,<br>A/AAGTAAATTTTT<br>TT<br>30349614, G/A |
| 3 | BAI1 associated protein 2 like 2              | BAIAP2L2 | 38483155,<br>T/TTCATGGGTG                              | 38482352,<br>GTGCGGGAGCGGG<br>ACTGGCCATCCCA<br>GTACTCCGAGGGT<br>GCTA/G<br>38483155,<br>T/TTCATGGGTG | -                                                      | 38482352,<br>GTGCGGGAGCGGG<br>ACTGGCCATCCCA<br>GTACTCCGAGGGT<br>GCTA/G | -                                | -                                                  |
| 3 | PR/SET domain 16                              | PRDM16   | 3328089, G/A                                           | -                                                                                                   | -                                                      | -                                                                      | 3328089, G/A                     | 3328826, G/A                                       |
| 3 | NODAL modulator 1                             | NOMO1    | -                                                      | -                                                                                                   | 14969016, T/A                                          | 14969016, T/A                                                          | -                                | 14969108, C/T                                      |
| 3 | sperm associated antigen 17                   | SPAG17   | 118584488, C/G                                         | -                                                                                                   | 118609491, C/A                                         | 118548044, G/T                                                         | -                                | -                                                  |
| 3 | maestro heat like repeat family member 2A     | MROH2A   | 234741285, G/A                                         | -                                                                                                   | 234740114, TC/T                                        | 234698550, C/T                                                         | -                                | -                                                  |
| 3 | SET domain containing 1B                      | SETD1B   | -                                                      | -                                                                                                   | 122261163, G/A                                         | 122260947, G/A                                                         | 30991144, C/T                    | -                                                  |
| 3 | keratin associated protein 1-3                | KRTAP1-3 | 39190954,<br>G/GCAGCAGCTTGG<br>CTGGCAGCAGCTG<br>GTCTCA | -                                                                                                   | 39190954,<br>G/GCAGCAGCTTGG<br>CTGGCAGCAGCTG<br>GTCTCA | 39190954,<br>G/GCAGCAGCTTGG<br>CTGGCAGCAGCTG<br>GTCTCA                 | -                                | -                                                  |

**Table S3.** Number of mutations found in either the primary or relapse tumor sample, or both.

| Patient       | Total    | Primary Total | Primary Only | Mutual   | Relapse Total | Relapse Only | Relapse Only MAF $\geq$ 0.2 | Increase * | Loss # |
|---------------|----------|---------------|--------------|----------|---------------|--------------|-----------------------------|------------|--------|
|               | <i>n</i> | <i>n</i>      | <i>n</i>     | <i>n</i> | <i>n</i>      | <i>n</i>     | N (%)                       | %          | %      |
| 1             | 330      | 290           | 14           | 276      | 316           | 40           | 20 (50)                     | 13.8       | 4.8    |
| 2             | 85       | 77            | 5            | 72       | 80            | 8            | 0 (0)                       | 10.4       | 6.5    |
| 3             | 884      | 796           | 69           | 727      | 815           | 88           | 52 (59)                     | 11.1       | 8.7    |
| 4             | 1038     | 949           | 59           | 890      | 979           | 89           | 9 (10)                      | 9.4        | 6.2    |
| 5             | 167      | 89            | 17           | 72       | 150           | 78           | 32 (41)                     | 87.6       | 19.1   |
| 6             | 202      | 151           | 100          | 51       | 102           | 51           | 46 (90)                     | 33.8       | 66.2   |
| <b>Median</b> |          |               |              |          |               |              |                             | 12.5       | 7.6    |

\* Increase of mutations = Primary total / Total; # Loss of mutations = Primary only / Primary total.

**Table S4.** List of kinases ( $n = 18$ ), JAK-STAT signaling ( $n = 7$ ), and glycoprotein ( $n = 73$ ) genes with mutations possibly related to therapy resistance.

| Gene                                                                   | Symbol   |
|------------------------------------------------------------------------|----------|
| <b>Kinases</b>                                                         |          |
| A-kinase anchoring protein 1                                           | AKAP1    |
| BCR, RhoGEF and GTPase activating protein                              | BCR      |
| NAD kinase                                                             | NADK     |
| NUAK family kinase 1                                                   | NUAK1    |
| Pim-1 proto-oncogene, serine/threonine kinase                          | PIM1     |
| checkpoint kinase 1                                                    | CHEK1    |
| cyclin dependent kinase inhibitor 2A                                   | CDKN2A   |
| diacylglycerol kinase eta                                              | DGKH     |
| diacylglycerol kinase zeta                                             | DGKZ     |
| doublecortin like kinase 1                                             | DCLK1    |
| dual specificity tyrosine phosphorylation regulated kinase 1B          | DYRK1B   |
| nucleolar protein 9                                                    | NOL9     |
| phosphatidylinositol-4,5-bisphosphate 3-kinase catalytic subunit alpha | PIK3CA   |
| phosphorylase kinase catalytic subunit gamma 1                         | PHKG1    |
| receptor tyrosine kinase like orphan receptor 1                        | ROR1     |
| serum/glucocorticoid regulated kinase 1                                | SGK1     |
| tau tubulin kinase 2                                                   | TTBK2    |
| tyrosine kinase 2                                                      | TYK2     |
| <b>JAK-STAT signaling pathway</b>                                      |          |
| Pim-1 proto-oncogene, serine/threonine kinase                          | PIM1     |
| interleukin 13 receptor subunit alpha 1                                | IL13RA1  |
| phosphatidylinositol-4,5-bisphosphate 3-kinase catalytic subunit alpha | PIK3CA   |
| suppressor of cytokine signaling 1                                     | SOCS1    |
| suppressor of cytokine signaling 2                                     | SOCS2    |
| tyrosine kinase 2                                                      | TYK2     |
| v-myc avian myelocytomatosis viral oncogene homolog                    | MYC      |
| <b>Glycoprotein</b>                                                    |          |
| ATP binding cassette subfamily A member 12                             | ABCA12   |
| ATPase Na <sup>+</sup> /K <sup>+</sup> transporting subunit beta 2     | ATP1B2   |
| BMP/retinoic acid inducible neural specific 3                          | BRINP3   |
| FAT atypical cadherin 3                                                | FAT3     |
| GDNF family receptor alpha like                                        | GFRAL    |
| HGF activator                                                          | HGFAC    |
| MAM domain containing glycosylphosphatidylinositol anchor 2            | MDGA2    |
| NODAL modulator 1                                                      | NOMO1    |
| NUS1 dehydrolipichyl diphosphate synthase subunit                      | NUS1     |
| UDP glucuronosyltransferase family 2 member B7                         | UGT2B7   |
| activating transcription factor 6 beta                                 | ATF6B    |
| adenylate cyclase 6                                                    | ADCY6    |
| astrotactin 1                                                          | ASTN1    |
| calreticulin                                                           | CALR     |
| carboxypeptidase Z                                                     | CPZ      |
| cholinergic receptor muscarinic 3                                      | CHRM3    |
| chromosome 17 open reading frame 77                                    | C17orf77 |
| collagen type VII alpha 1 chain                                        | COL7A1   |
| diacylglycerol lipase alpha                                            | DAGLA    |
| dynein axonemal heavy chain 10                                         | DNAH10   |
| endothelial cell adhesion molecule                                     | ESAM     |
| fibrinogen beta chain                                                  | FGB      |
| follicle stimulating hormone receptor                                  | FSHR     |

|                                                               |           |
|---------------------------------------------------------------|-----------|
| galectin 3 binding protein                                    | LGALS3BP  |
| gamma-aminobutyric acid type A receptor pi subunit            | GABRP     |
| glutamate ionotropic receptor kainate type subunit 2          | GRIK2     |
| glycine receptor beta                                         | GLRB      |
| glycoprotein 2                                                | GP2       |
| glycosyltransferase 8 domain containing 1                     | GLT8D1    |
| histamine receptor H4                                         | HRH4      |
| histone cluster 1 H2B family member m                         | HIST1H2BM |
| histone cluster 2 H2B family member f                         | HIST2H2BF |
| hyaluronan binding protein 2                                  | HABP2     |
| immunoglobulin superfamily member 3                           | IGSF3     |
| interleukin 13 receptor subunit alpha 1                       | IL13RA1   |
| interleukin 4 induced 1                                       | IL4I1     |
| keratin 18                                                    | KRT18     |
| killer cell immunoglobulin like receptor, three Ig domains X1 | KIR3DX1   |
| laminin subunit gamma 2                                       | LAMC2     |
| lysozyme like 2                                               | LYZL2     |
| lysyl oxidase like 3                                          | LOXL3     |
| macrophage expressed                                          | MPEG1     |
| melanoma cell adhesion molecule                               | MCAM      |
| netrin 5                                                      | NTN5      |
| neuritin 1 like                                               | NRN1L     |
| olfactory receptor family 14 subfamily A member 16            | OR14A16   |
| olfactory receptor family 2 subfamily T member 34             | OR2T34    |
| olfactory receptor family 6 subfamily T member 1              | OR6T1     |
| olfactory receptor family 8 subfamily I member 2              | OR8I2     |
| olfactory receptor family 8 subfamily K member 1              | OR8K1     |
| podocalyxin like                                              | PODXL     |
| potassium sodium-activated channel subfamily T member 2       | KCNT2     |
| procollagen-lysine,2-oxoglutarate 5-dioxygenase 2             | PLOD2     |
| proprotein convertase subtilisin/kexin type 1                 | PCSK1     |
| proteasome subunit beta 1                                     | PSMB1     |
| protocadherin alpha 5                                         | PCDHA5    |
| receptor tyrosine kinase like orphan receptor 1               | ROR1      |
| roundabout guidance receptor 1                                | ROBO1     |
| semaphorin 4A                                                 | SEMA4A    |
| signal regulatory protein beta 1                              | SIRPB1    |
| sodium voltage-gated channel alpha subunit 3                  | SCN3A     |
| solute carrier family 22 member 6                             | SLC22A6   |
| solute carrier family 4 member 4                              | SLC4A4    |
| somatostatin receptor 5                                       | SSTR5     |
| stabilin 2                                                    | STAB2     |
| synaptotagmin 1                                               | SYT1      |
| taste 1 receptor member 3                                     | TAS1R3    |
| taste 2 receptor member 50                                    | TAS2R50   |
| tetraspanin 17                                                | TSPAN17   |
| transforming growth factor beta receptor 3                    | TGFB3     |
| transmembrane protein 123                                     | TMEM123   |
| tryptase alpha/beta 1                                         | TPSAB1    |
| v-myc avian myelocytomatosis viral oncogene homolog           | MYC       |
